# Supplementary material for: Therapeutic options for advanced epidermal growth factor receptor (EGFR)-mutant non-small cell lung cancer: a Bayesian network secondary analysis
Source: publisher site journal article supplement (doi:10.18632/aging.103066), 2020-04-23
Supplement: Supplementary file [file aging-v12i8-103066-supplementary-material-SD2.pdf]

## APPENDIX FIGURES

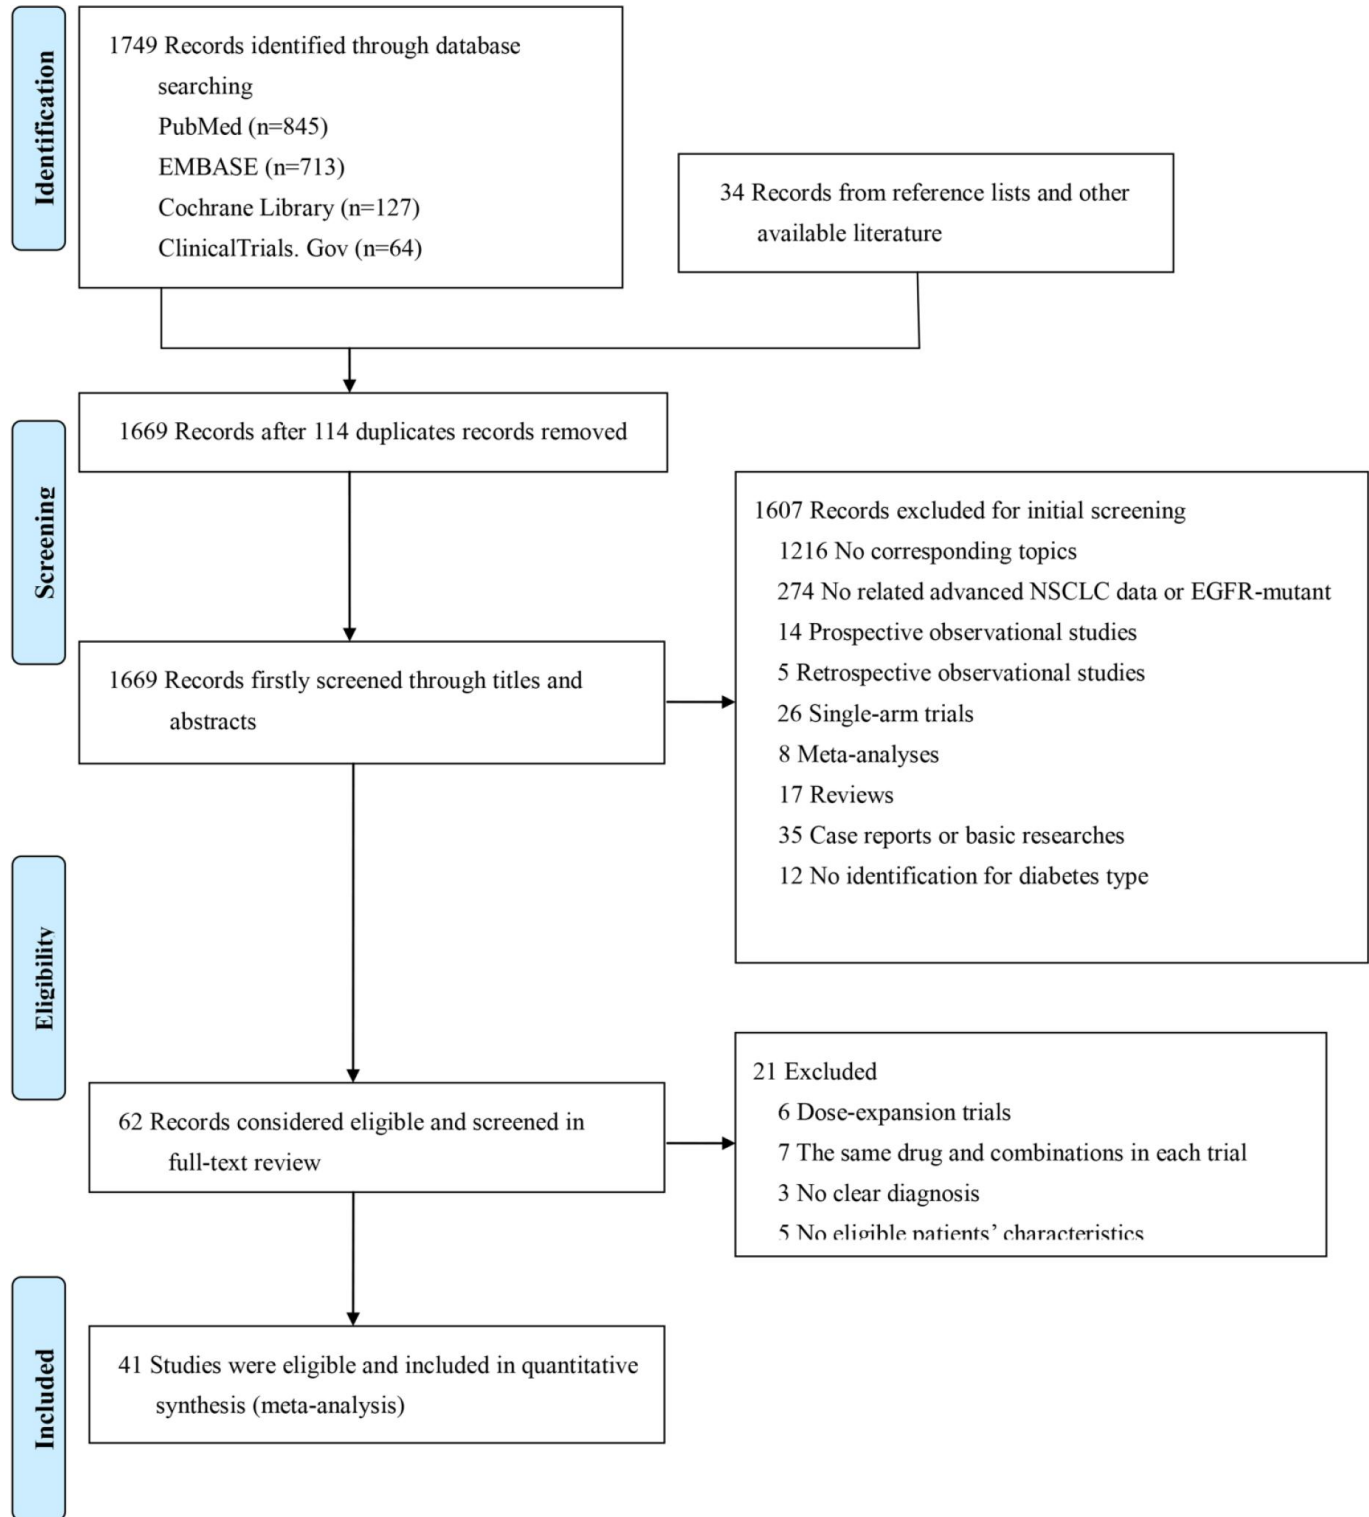

Appendix Figure 1. Study flow chart.

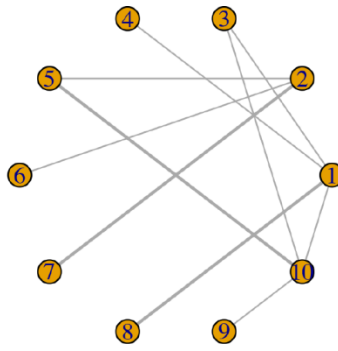

1 = Gef 2 = Erlo 3 = Afa 4 = Dac 5 = Osi 6 = Naq 7 = Erlo +  
 Bev 8 = Gef + Peme 9 = Cet + Plat 10 = Plat

**Appendix Figure 2. Network plot for ORR in treatment-level analysis.**

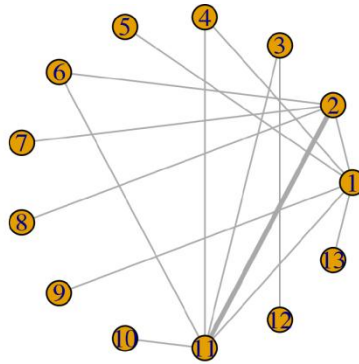

1 = Gef 2 = Erlo 3 = Ico 4 = Afa 5 = Dac 6 = Osi 7 = Naq  
 8 = Erlo + Bev 9 = Gef + Peme 10 = Cet + Plat 11 = Plat  
 12 = WBRT 13 = Placebo

**Appendix Figure 3. Network plot for grade 3 or higher AEs in treatment-level analysis.**

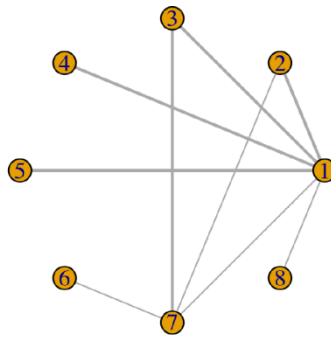

1 = 1st gen ET 2 = 2nd gen ET 3 = 3rd gen ET 4 = ET + aVEGFR  
 5 = ET + CT 6 = ET + Plat 7 = Plat 8 = WBRT

Appendix Figure 4. Network plot for ORR in class-level analysis.

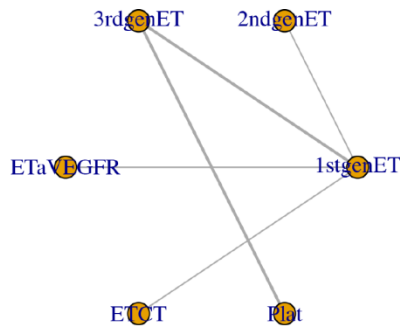

Treatments include: **1st gen ET, 2nd gen ET, 3rd gen ET, ET + aVEGFR, ET + CT, Plat**

Appendix Figure 5. Network plot for DoR in class-level analysis.

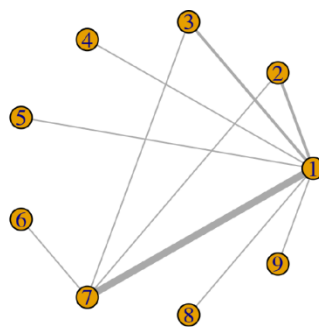

1 = 1st gen ET 2 = 2nd gen ET 3 = 3rd gen ET 4 = ET + aVEGFR  
 5 = ET + CT 6 = ET + Plat 7 = Plat 8 = WBRT 9 = Placebo

Appendix Figure 6. Network plot for grade 3 or higher AEs in class-level analysis.
